# Supplementary material for: A microporous metal–organic framework constructed from a 1D column made of linear trinuclear manganese secondary building units
Source: Royal Society of Chemistry journal article supplement (doi:10.1039/b927590h), 2010-01-01
Supplement: b927590h.pdf [file b927590h.pdf]

## Supporting Information

# **A Microporous Metal–Organic Framework Constructed from a 1D Column Made of Linear Trinuclear Manganese Secondary Building Units**

Sehyun Jung,<sup>a</sup> Jungwook Choi,<sup>a</sup> Mira Park,<sup>a</sup> Minhak Oh,<sup>a</sup> Dohyun Moon<sup>\*b</sup> and Myoung  
Soo Lah<sup>\*a</sup>

<sup>a</sup> Department of Chemistry and Applied Chemistry, College of Science  
and Technology, Hanyang University, Ansan, Kyunggi-Do 426-791,  
Korea. Fax: 82 31 436 8100; Tel: 82 31 400 5496  
E-mail: mslah@hanyang.ac.kr

<sup>b</sup> Pohang Accelerator Laboratory, Pohang, Kyungbook 790-784, Korea.

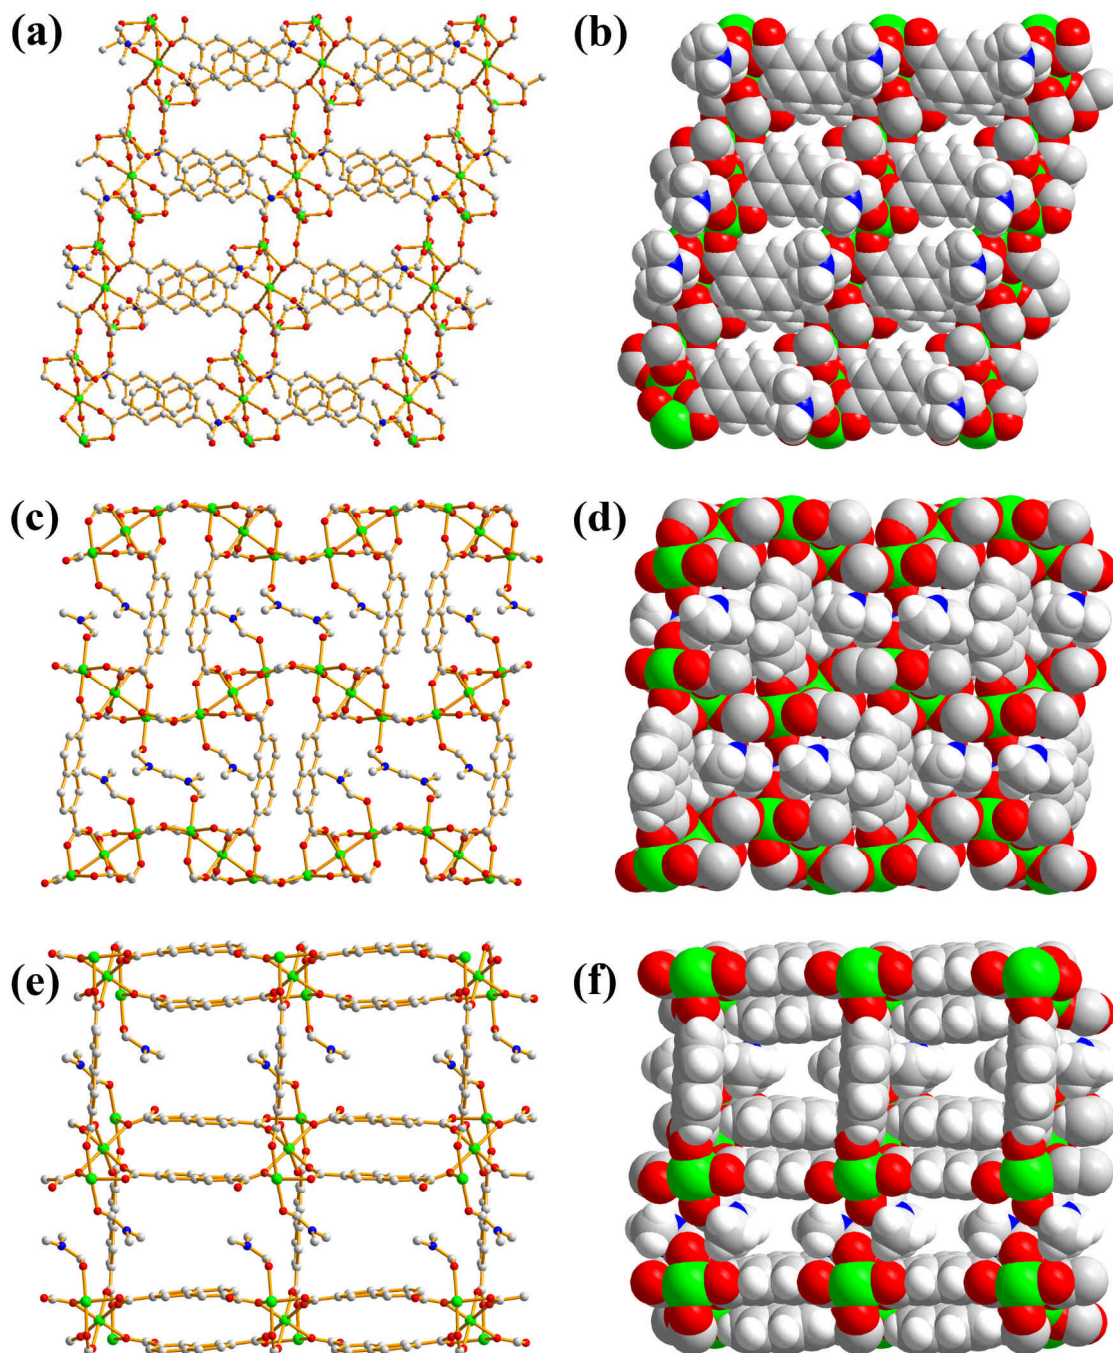

**Figure S1.** 2D layers in ball-and-stick and CPK diagrams of **1** viewed along (a) and (b) the (455) direction, (c) and (d) the (01-1) direction, and (e) and (f) the (211) direction.

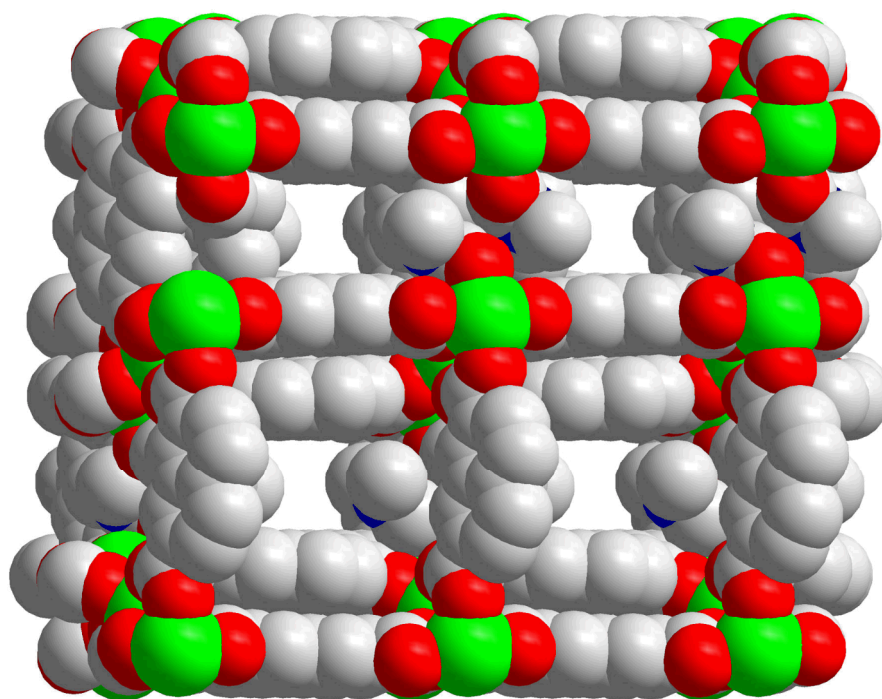

**Figure S2.** CPK drawing of **1**.
